# Supplementary material for: Partnering with patients in quality improvement: towards renewed practices for healthcare organization managers?
Source: PubMed Central journal article supplement (PMC6839263; doi:10.1186/s12913-019-4618-8), 2019-11-08
Supplement: 12913_2019_4618_MOESM1_ESM.pdf [file 12913_2019_4618_MOESM1_ESM.pdf]

### **Additional file 1: a selection of interview questions with managers**

- 1- What is your function in the organization?
- 2- Can you describe the patient partnership approach in quality improvement that has been implemented in your organization?
- 3- In which quality improvement activities or teams are patient advisors involved?
- 4- What is your role in implementing the patient partnership approach, in integrating patient advisors in quality improvement activities or teams?
- 5- What are your tasks, daily activities related to this approach?
- 6- With whom (department, program, type of managers) do you collaborate to ensure these activities?
- 7- What challenges do you face as a manager to implement this approach and ensure the management and the evaluation of these activities?
