# Supplementary material for: Partnering with patients in quality improvement: towards renewed practices for healthcare organization managers?
Source: PubMed Central journal article supplement (PMC6839263; doi:10.1186/s12913-019-4618-8), 2019-11-08
Supplement: 12913_2019_4618_MOESM2_ESM.pdf [file 12913_2019_4618_MOESM2_ESM.pdf]

**Additional file 2: Managerial practices used at different management levels to implement patient partnership in quality improvement**

| Type of managerial practices | Key practices of managers at different levels                                                                                                                                                                                                                                                                                                                                                                                                                                                                                                                                                                                                                                                                                                                       |
|------------------------------|---------------------------------------------------------------------------------------------------------------------------------------------------------------------------------------------------------------------------------------------------------------------------------------------------------------------------------------------------------------------------------------------------------------------------------------------------------------------------------------------------------------------------------------------------------------------------------------------------------------------------------------------------------------------------------------------------------------------------------------------------------------------|
| <b>Designing PP</b>          | <p><b>Top-level managers:</b><br/>           Adopt and maintain an organizational vision of PP (case 1)<br/>           Integrate PP in the code of ethics (case 1)</p> <p><b>Top-level and mid-level managers:</b><br/>           Develop a reference framework of the PP model (principles and associated values) (case 1)<br/>           Include PP in the code of ethics (cases 1&amp;2)<br/>           Promote PP among patients, providers and managers and raise awareness about the contribution of PA in QI (case 1)<br/>           Ensure alignment between top-level, mid-level and front-line managers regarding the PP model (case 1)</p> <p><b>Mid-level managers:</b><br/>           Transfer PP experience and knowledge among managers (case 1)</p> |
| <b>Structuring PP</b>        | <p><b>Top-level managers:</b><br/>           Include PP as part of the HCO's strategic goals (cases 1 &amp; 2)<br/>           Appoint a department and managers in charge of PP (cases 1 &amp; 2) and ensure continuity among the mid-level managers in charge of PP (case 1)</p> <p><b>Mid-level managers:</b><br/>           Provide sufficient funds to compensate PA involved in QI activities (case 1 &amp; 2)<br/>           Involve a PA to collaboratively structure the PP model (case 1)</p>                                                                                                                                                                                                                                                              |

|                                                                                              |                                                                                                                                                                                                                                                                                                                                                                                                                                                                                                                                                                                                                                                                                                                                                                                                                                                                           |
|----------------------------------------------------------------------------------------------|---------------------------------------------------------------------------------------------------------------------------------------------------------------------------------------------------------------------------------------------------------------------------------------------------------------------------------------------------------------------------------------------------------------------------------------------------------------------------------------------------------------------------------------------------------------------------------------------------------------------------------------------------------------------------------------------------------------------------------------------------------------------------------------------------------------------------------------------------------------------------|
|                                                                                              | <p>Develop a logic model of PP (goals, targets and strategies to deploy PP) and review it over time (case 1)</p> <p>Coordinate a structured PA integration process in QI (case 1)</p> <p>Create and manage a list of potential PAs (cases 1&amp;2)</p>                                                                                                                                                                                                                                                                                                                                                                                                                                                                                                                                                                                                                    |
| <p><b>Operationalizing PP</b></p> <p>-</p> <p><b>Managing PA integration in QI teams</b></p> | <p><b>Front-line managers:</b></p> <p>Identify potential PAs with support from providers (cases 1&amp;2)</p> <p>Stimulate and support the partnership among PAs, providers and managers (cases 1&amp;2)</p> <p>Facilitate compromise when setting QI objectives (cases 1&amp;2)</p> <p><b>Mid-level managers:</b></p> <p>Recruit and prepare PA before their integration in QI activities (cases 1&amp;2)</p> <p>Provide individual training to QI teams and explanatory documents on PP methods (case 1)</p> <p>Create a community of practice and a chart for good PP practices (case 2)</p> <p>Set rules to facilitate PAs participation and integration in QI teams (cases 1&amp;2)</p> <p><b>Mid-level managers and front-line managers:</b></p> <p>Create an informal committee to foster the harmonization of PP practices in the context of a merger (case 2)</p> |
| <p><b>Evaluating PA integration in QI teams</b></p>                                          | <p><b>Front-line managers:</b></p> <p>Ensure feedback from PAs and QI teams regarding their partnership experience (cases 1&amp;2)</p> <p><b>Mid-level managers:</b></p> <p>Formally evaluate the PA integration process (case 1)</p> <p>Collect structural indicators on PP activities (case 1)</p>                                                                                                                                                                                                                                                                                                                                                                                                                                                                                                                                                                      |
